# Supplementary material
Source: MDPI journal article supplement (https://www.mdpi.com/1660-4601/12/1/871)
Supplement: s1 [file s1]

## Prevalence and Determinants of Mucous Membrane Irritations in a Community Near a Cement Factory in Zambia: A Cross Sectional Study

### A. Selection of Study Participants (Geocoding)

Study participants were selected using multi-stage random sampling approach. The first tier of sampling frame was obtained by dividing each of the two communities into clusters of households using the latest Google Earth maps of the two communities (Figures S1 and S2).

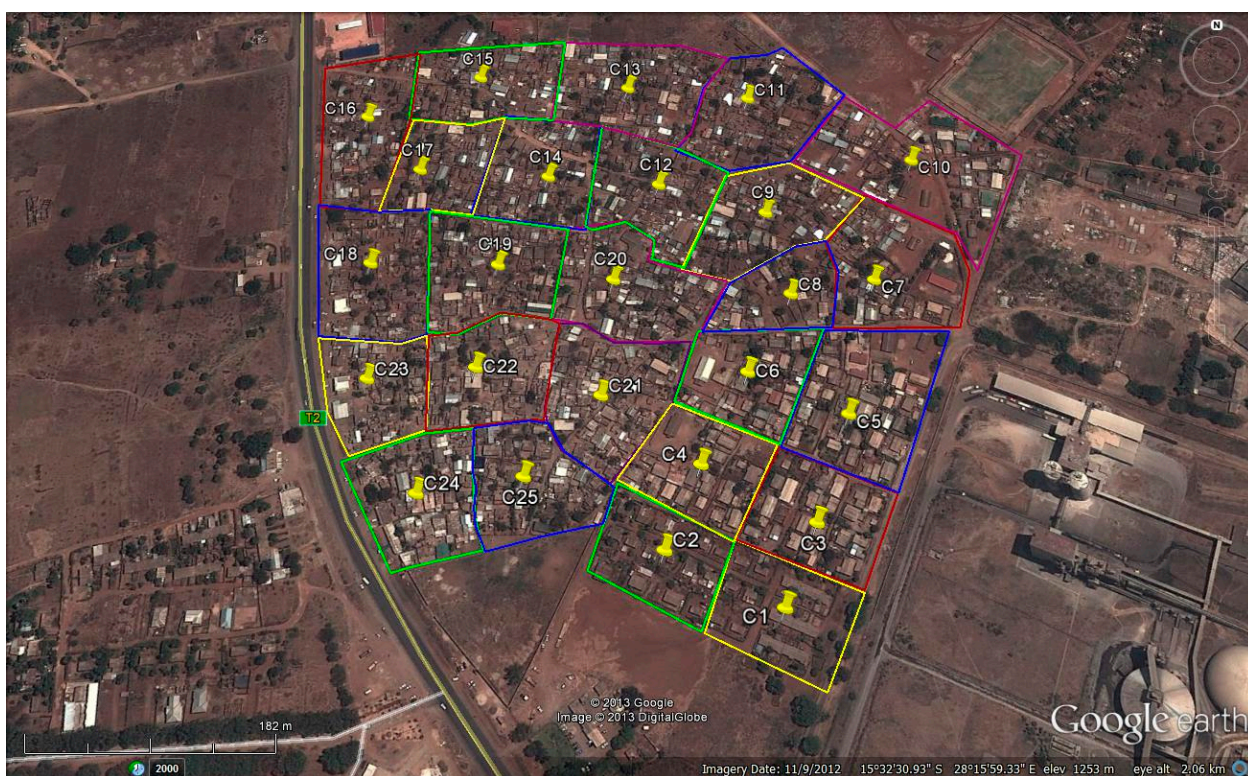

**Figure S1.** Freedom compound.

The cluster size was determined depending on geophysical arrangement of the households, e.g., division by main roads, markets, schools or other geographical features like a stream or river. As there was no pre-enumeration of households in both communities, attempts at getting equal number of households per cluster was ensured by making clusters of roughly equal geographical dimensions. This resulted in 25 and 42 clusters in Freedom and Bauleni respectively.

This was followed by identification and physical mapping of the clusters using GPS coding. The delineated clusters for each community were then numbered sequentially and entered into Microsoft Excel to form the first tier of sampling frame (one for each community). A subset of 10 clusters from each sampling frame was randomly chosen using random number generator in Excel. Excel was set to generate random number between 0 and 1 using the “RAND ()” function. Two empty columns were created adjacent to the column listing the clusters. Random numbers were generated in



one column. These were copied and pasted, as values, in the other empty column. The values were then sorted and the first ten numbers corresponding to 10 clusters were selected [1]. This ensured that the clusters were selected at random and representative of the community.

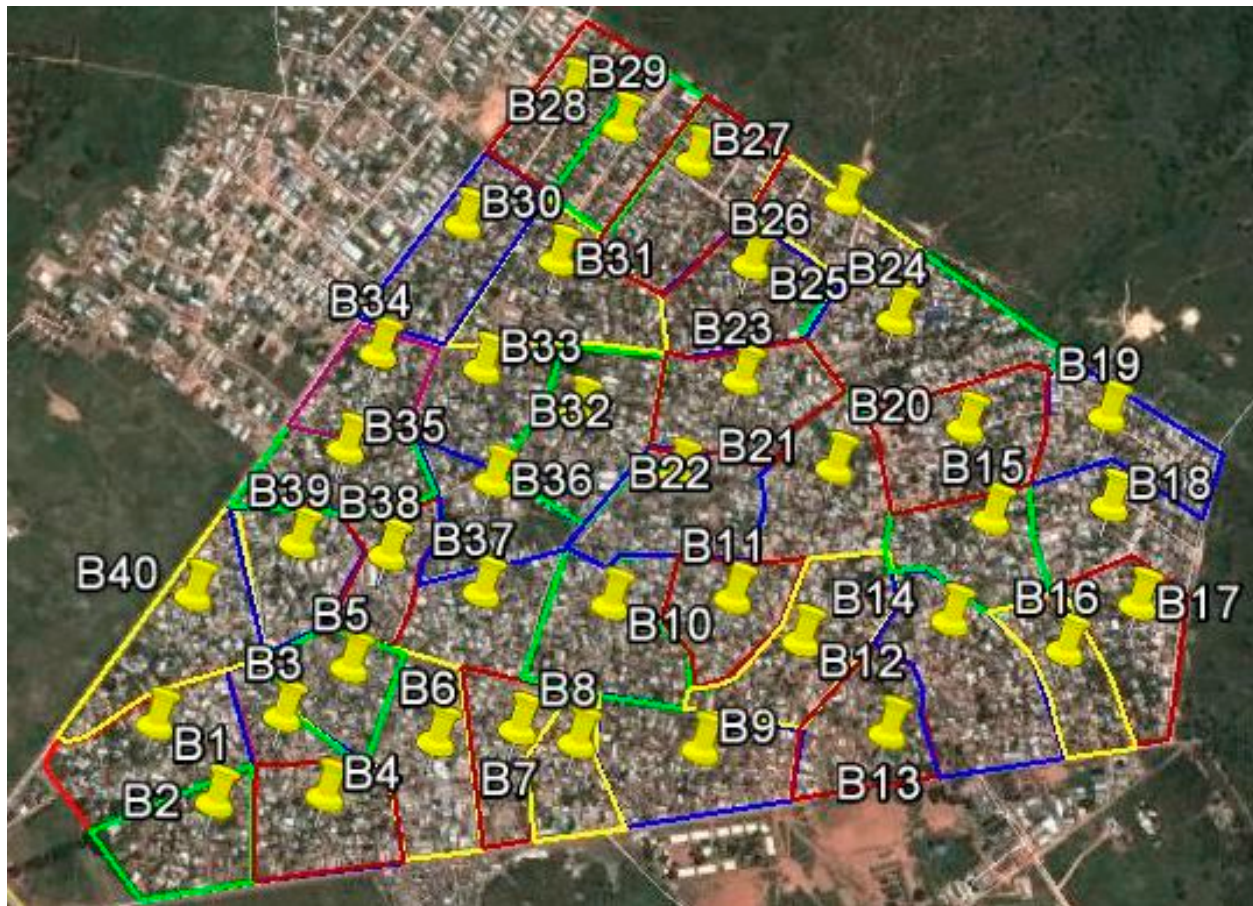

**Figure S2.** Bauleni compound.

The second tier of sampling frame comprised all households in the selected clusters. Each household in each selected cluster was numbered using GPS geocodes (and house numbers where possible). Separate sampling frames for each cluster was entered in Microsoft Excel and a random subsample of 22 households was obtained following the method described in the previous section. A total of 220 households were thus selected for each community. This was done to ensure the included households were chosen at random and were representative of the community. The chosen households were then visited, aided by the geocodes and house numbers, to determine household eligibility.

Consent was sought from the head of each household to participate in the study. Individuals who met the inclusion criteria and gave consent were numbered sequentially on small pieces of paper, which were put in a bag and one selected by lottery. This was followed by administration of a questionnaire. Where there was only one individual meeting the inclusion criteria in the household, that individual was chosen for inclusion in the study.

In the event that the head of household declined to participate, the entire house then became ineligible, the next available household was chosen randomly. This was done by numbering clockwise the immediate surrounding households on pieces of paper. Then the pieces of paper bearing the

numbers were put in a box, shaken and one paper drawn at random. The chosen household replaced the one that did not meet the inclusion criteria in the initial sampling. If the replacement household did not meet the inclusion criteria, the procedure was repeated. In the repeat sampling all households that did not meet the inclusion criteria were excluded.

**B. Questionnaire: Does Exposure to Cement Emission Cause an Increased Risk of Mucous Membranes Irritation: a Cross Sectional Study**

**Demography Information**

1. Gender

Male

Female

2. What is the ethnic group of the household?

1. Black

2. Other  Specify.....

3. What is your marital status

1. Married

2. Single

3. Divorced

4. Widowed

4. What is your age at your last birthday?

5. What is your highest Level of education you have attained?

1. Primary

2. secondary

3. Tertiary

4. None

6. For how long have you lived in this community?

.....Months.....Years

7. How many people usually live in this household?

8. How many residences have you changed in the last 10 years?

.....

9. Are you likely to shift from this community in the next four months

Yes  No

**Social Economic Status**

10. How many rooms does your house have? (Do not take into account the cooking areas if it is not within the main structure)

.....rooms

11. The house where you live, is it?

- a. Owned
- b. Rented
- c. Borrowed
- d. Other (specify).....

12. How old (approximate years) is your house?

- a. ....years
- b. Not known

13. How many persons provide economic support for the house

..... Person (s)

14. What is your occupation?

- 1. Bricklayer
- 2. Housewife
- 3. Farm worker
- 4. Student
- 5. Other  (Specify).....

15. Do you own any of the following appliances or vehicles

- a. Radio            yes            No
- b. Television    Yes            No
- c. Refrigerator   Yes            No
- d. Bicycle        Yes            No
- e. Motorcycle    Yes            No
- f. Car             Yes            No

**(Q16 to 22, ask the following and observe)- Household structural characteristics**

16. How many rooms does the house have:

- 1.
- 2.
- 3.
- 4.
- 5. Others  (Specify).....

17. Number of windows in the house?

- 1.
- 2.
- 3.
- 4.
- 5. Others  (Specify).....

18. Number of the doors in the house?

- 1.
- 2.
- 3.
- 4.
- 5. Others  (Specify).....

19. What material is the house made of? (Observe)

- 1. Pan bricks
- 2. Mud bricks
- 3. Concrete blocks
- 4. Metal sheets
- 5. Other  Specify.....

20. What is the wall finish of the house?

- 1. Plastered
- 2. Un-plastered

21. What is the roof made of?

- 1. Grass thatched
- 2. Metal sheets
- 3. Asbestos sheets
- 4. Plastic
- 5. Other  Specify.....

22. Is there a floor carpet in the house?

- 1. Yes
- 2. No

**Determinants of exposure**

23. How is the kitchen located in reference to main house?

- 1. Within main house
- 2. Separate from main house in an enclosed structure
- 3. Outside in an open space  (Skip to Q25)

24. If cooking is done within main house, is it done in the room where you sleep?

- 1. Yes
- 2. No

25. What is the main source of energy for cooking?

- 1. Electricity
- 2. Charcoal
- 3. Firewood
- 4. Rechargeable lamp
- 5. Other  (Specify).....

26. What is the source of energy for lighting?

- 1. Electricity
- 2. Firewood
- 3. Paraffin lamp
- 4. Others  (specify) .....

27. Form of ventilation? Tick all that applies for each room

| Room | Through Ventilation | Cross Ventilation | None |
|------|---------------------|-------------------|------|
| 1    |                     |                   |      |
| 2    |                     |                   |      |
| 3    |                     |                   |      |
| 4    |                     |                   |      |
| 5    |                     |                   |      |
| 6    |                     |                   |      |
| 7    |                     |                   |      |
| 8    |                     |                   |      |
| 9    |                     |                   |      |
| 10   |                     |                   |      |

28. Measure size of the window in relation to floor area? **{Excluding toilet and bathroom}**

| Room | Floor Area | Size of Window |
|------|------------|----------------|
| 1    |            |                |
| 2    |            |                |
| 3    |            |                |
| 4    |            |                |

**Questions on Lifestyle**

29. Do you smoke or have you ever smoked cigarette?

- 1. Never smoked  **Skip to 36)**
- 2. Ex-smoker  **(Complete Qs 31-32)**
- 3. Smoke now  **(Skip to Q33)**

30. If **ex- smoker**, how long ago did you quit smoking?

..... Months..... Years

31. If ex-smokers, how many years did you smoke before you quit smoking?

..... years

32. How many cigarettes were you smoking per day?

..... Cigarettes

33. If **current**, what type of cigarette do you smoke?

- 1. Factory manufactured cigarette?
- 2. Locally rolled tobacco?
- 3. Both

34. If **current smoker**, approximately how many cigarettes a day do you smoke?

35. How long have you been smoking?

36. Does any of the household members smoke?

Yes  No

37. Do they smoke in the house?

Never   
Occasionally   
Almost every day but only a few cigarettes (up to 2)   
Almost daily many cigarettes (more than 2)

38. Where do you spend most of your time?

Away from home   
Around home/inside home   
Other  (specify) .....

39. How do you spend most of your time during the day?

- 1. In and around the home
- 2. Away from home, but within Chilanga/Bauleni

3. Away from home, out of Chilanga/Bauleni   
 (specify) .....

**Respiratory health symptoms**

40. Do you experience any of the following with your eyes? (tick all that applies[PROMPT])

- a. Itching
- b. Swelling
- c. Discharge
- d. Excessive tearing

41. Do you experience any of the following with your nose? (tick all that applies)

- a. Itching
- b. Sensation of fullness, congestion
- c. Blockage
- d. Discharge or runny nose

42. Do you experience any of the following with your sinuses (tick all that applies)

- a. Head or pain in the face
- b. Blowing out thick mucus
- c. Postnatal drip in the back of throat
- d. Throat clearing or hoarseness of voice

**Cough**

43. Do you usually have a cough? (Count a cough with smoke or on first going out-of-doors. Exclude clearing of throat)

Yes  No  *(If NO skip to question 45)*

44. Do you usually cough as much as 4 times to 6 times a day, 4 or more days out of the week?

Yes  No

45. Do you usually cough at all on getting up, or first thing in the morning?

Yes  No

46. Do you usually cough at all OR during the rest of the day OR at night?

Yes  No  *If Yes to any 43,44, 45 or 46, ASK 47 and 48*

47. Do you usually cough like this on most days for 3 consecutive months or more during the year?

Yes  No

48. For how many years have you had this cough?

..... days  
 ..... Does not apply



**Phlegm**

49. Do you usually bring up phlegm from your chest? (Count phlegm with the first smoke or going out-of-door. Excluding from nose. Count swallowed phlegm) *[if NO skip to 54]*

Yes  No  *(In NO skip to 51)*

50. Do you usually bring up phlegm as much as twice a day, 4 or more days out of a week?

Yes  No

51. Do you usually bring up phlegm at all on getting up, or first thing in the morning?

Yes  No

52. Do you usually bring up phlegm at all during the rest of the day or at night?

Yes  No

**If YES to any of the above (49, 50, 51 or 52) ASK 52 and 53: If NO to all, skip to 55**

53. Do you bring phlegm like this on most days for 3 consecutive months or more during the year?

Yes  No

54. For how many years have you had this cough?

..... years  
..... Does not apply

**Episodes Of Cough**

55. Have you had periods or episodes of increased cough or phlegm lasting 3 weeks or more year (**for persons who usually have cough**)

Yes  No  *(If NO Skip, GO to Q56)*

56. For how long have you had at least 1 (one) such episode?

..... Number of years  
..... Does not apply

**Episodes of Phlegm**

57. Have you had periods or episodes of increased phlegm lasting 3 weeks or more each year (**for persons who usually have phlegm**)

Yes  No  Does not apply  *(Skip to Q58)*

58. For how long have you had at least 1 (one) such episode?

..... Number of years  
..... Does not apply

**Wheezing**

59. Does your chest ever sound wheezing or whistling (**Tick all that applies**)

- 1. when you have a cold            Yes     No
- 2. occasionally apart from colds    Yes     No
- 3. most days or nights apart from a cold    Yes     No

**If YES, to 1, 2, or 3 in Q59; ASK Q 60. If NO skip, GO to Q61, Q62 and Q63**

60. For how many years has this been present

..... year (s)  
 ..... does not apply

61. Have you ever had an attack of wheezing that has made you feel out of breath?

Yes     No     ()

62. How old were you when you had your first attack?

..... years

63. Have you ever required medicine or treatment for the(se) attack(s)

Yes     No

**Breathlessness**

64. Are you troubled by shortness of breath when hurrying on the level or walking up a slight hill?

Yes     No     (**If NO skip, Go to Q69**)

**If Yes in Q64 ASK Q65, Q66, Q67 and Q68**

65. Do you have to walk slower than people of your age on the level because of breathless?

Yes     No     Does not apply

66. Do you ever have to stop for a breath when walking at your pace on the level?

Yes     No     Does not apply

67. Do you ever have to stop to breathe after walking a few minutes on the level?

Yes     No     Does not apply

68. Are you breathless to leave the house or breathless on dressing or undressing?

Yes     No     Does not apply

**Chest Cold And Chest Illness**

69. If you get a cold, does it usually go to your chest (usually more than ½ the times?)

Yes  No  Don't get colds

70. During the past 3 years, have you had any chest illness that kept you from work or school, or in doors at home, or in bed?

Yes  No

**If YES to Q70 ASK Q71 and 72, IF NO skip to 73**

71. Did you produce phlegm with any of these chest illnesses

Yes  No

72. In the last 3 years, how many such illnesses with (increased) phlegm, did you have which lasted a week or more?

..... Number of illnesses  
 ..... No such illnesses  
 ..... Does not apply

**Past Illnesses**

73. Did you have any lung troubles before age of 16? [If participant is over 16 years]

Yes  No

74. Have you had any of the bronchitis?

Yes  No  *(If No Skip, GO to Q75)*

**If Yes**

1. Was it confirmed by a doctor? Yes  No

2. At what age was the first attack?

..... years  
 ..... does not apply

75. Have you had pneumonia (including bronchopneumonia)

Yes  No  *(IF NO skip, GO to Q76)*

**If Yes**

1. Was it confirmed by a doctor? Yes  No

2. At what age was the first attack?

..... years

.....does not apply

76. Have you had chronic bronchitis

Yes  No  (If NO skip, GO to Q77)

**If YES**

1. Was it confirmed by a doctor? Yes  No

2. Do you still have it? Yes  No  Does not apply

3. At what age was the first attack?

..... years

..... does not apply

77. Have you had asthma?

Yes  No  (If NO, end of Questionnaire, Thank you the participant)

**If YES**

1. Was it confirmed by a doctor? Yes  No

2. Do you still have it? Yes  No  Does not apply

3. At what age was the first attack? ..... years.....

4. If you no longer have it, at what age did it stop? .....years

**References**

1. How to Create a Random Sample in Excel. Available online: <http://www.wikihow.com/Create-a-Random-Sample-in-Excel> (accessed on 12 November 2012).
